# Supplementary material for: Intrinsic Brain Activity in Temporal Lobe Epilepsy With and Without Depression: Insights From EEG Microstates
Source: Front Neurol. 2022 Jan 4;12:753113. doi: 10.3389/fneur.2021.753113 (PMC8764160; doi:10.3389/fneur.2021.753113)
Supplement: Supplementary file 2 [file Data_Sheet_2.CSV]

DataSet	Group	Template	ExpVar	SortInfo	TotalTime	Duration_1	Duration_2	Duration_3	Duration_4	MeanDuration	Occurrence_1	Occurrence_2	Occurrence_3	Occurrence_4	MeanOccurrence	Contribution_1	Contribution_2	Contribution_3	Contribution_4	OrgTM_1->1	OrgTM_1->2	OrgTM_1->3	OrgTM_1->4	OrgTM_2->1	OrgTM_2->2	OrgTM_2->3	OrgTM_2->4	OrgTM_3->1	OrgTM_3->2	OrgTM_3->3	OrgTM_3->4	OrgTM_4->1	OrgTM_4->2	OrgTM_4->3	OrgTM_4->4	ExpTM_1->1	ExpTM_1->2	ExpTM_1->3	ExpTM_1->4	ExpTM_2->1	ExpTM_2->2	ExpTM_2->3	ExpTM_2->4	ExpTM_3->1	ExpTM_3->2	ExpTM_3->3	ExpTM_3->4	ExpTM_4->1	ExpTM_4->2
D1	PDS	GrandMeanDD	0.798406	user->GrandMeanDD	465.064	0.052934	0.07134	0.084809	0.061272	0.071862	2.363323	4.09335	4.47796	3.357321	14.29195	0.126515	0.291253	0.373967	0.208266		0.053346	0.060468	0.041765	0.046851		0.143641	0.08516	0.064619	0.144064		0.098592	0.044302	0.077123	0.100117			0.055975	0.061176	0.045566	0.06491		0.131969	0.090759	0.073697	0.137409		0.106031	0.049841	0.086115
D11	PDS	GrandMeanDD	0.842887	user->GrandMeanDD	494.438	0.073174	0.069168	0.150702	0.065358	0.100527	2.669088	2.597524	3.668471	2.003404	10.93849	0.19672	0.17471	0.499913	0.128657		0.04689	0.137134	0.043413	0.051604		0.111741	0.047265	0.132847	0.120196		0.077481	0.042161	0.041715	0.083437			0.070156	0.119879	0.054596	NaN		NaN	NaN	0.133277	0.119418		0.09363	0.050682	0.050609
D12	PDS	GrandMeanDD	0.797092	user->GrandMeanDD	516.346	0.069603	0.073	0.059914	0.060844	0.067552	4.278916	4.313824	3.238085	3.350833	15.18166	0.294039	0.310334	0.192803	0.202825		0.123206	0.071295	0.078159	0.113563		0.082601	0.078961	0.074644	0.072837		0.055734	0.081415	0.078098	0.051996			0.111524	0.083814	0.085389	0.111903		0.085304	0.087529	0.076948	0.078135		0.059267	0.079338	0.08097
D13	PDS	GrandMeanDD	0.739526	user->GrandMeanDD	446.709	0.055257	0.052464	0.058496	0.060709	0.05767	4.593706	3.661805	4.345268	5.099208	17.69999	0.250487	0.191656	0.25206	0.305797		0.069822	0.079242	0.100922	0.069555		0.058081	0.07233	0.078869	0.053661		0.105524	0.103837	0.077762	0.098721			0.073245	0.085057	0.100776	0.068636		0.063506	0.075086	0.084185	0.066861		0.094028	0.1056	0.083512
D14	PDS	GrandMeanDD	0.776384	user->GrandMeanDD	482.173	0.066252	0.074154	0.074851	0.064908	0.071713	3.219331	4.175722	3.715377	3.271337	14.38177	0.212522	0.302985	0.274025	0.210469		0.086604	0.064641	0.063567	0.083628		0.113447	0.079317	0.064912	0.108324		0.074944	0.066241	0.084344	0.070317			0.084814	0.071472	0.067927	0.090544		0.106829	0.091527	0.074864	0.104483		0.079107	0.067629	0.085377
D16	PDS	GrandMeanDD	0.741515	user->GrandMeanDD	480.234	0.076176	0.070342	0.064908	0.102443	0.081339	3.421665	3.106207	2.265837	3.969102	12.76281	0.253899	0.214853	0.144175	0.387073		0.076515	0.055436	0.124386	0.083337		0.043332	0.103707	0.047268	0.047805		0.071863	0.125667	0.105862	0.068739			0.088599	0.062835	0.117281	0.085585		0.055472	0.101138	0.056752	0.05183		0.067586	0.123356	0.110404
D17	PDS	GrandMeanDD	0.822151	user->GrandMeanDD	428.699	0.092052	0.061583	0.079029	0.039985	0.079242	4.793582	3.557341	4.50521	0.084415	12.94055	0.427762	0.219124	0.349744	0.00337		0.138596	0.214612	0.002041	0.140023		0.117835	0.001911	0.212974	0.119007		0.002255	0.003129	0.00102	0.002057			0.158718	0.209352	0.003517	0.139993		0.130724	0.002073	0.202774	0.143203		0.003441	0.002334	0.001572
D18	PDS	GrandMeanDD	0.778288	user->GrandMeanDD	500.112	0.058662	0.070159	0.05987	0.065501	0.064443	3.259902	4.589319	3.470605	4.465991	15.78582	0.189639	0.316702	0.205682	0.287977		0.080317	0.05052	0.067264	0.08573		0.076742	0.119744	0.051057	0.0757		0.085499	0.06339	0.124484	0.084076			0.077271	0.057078	0.071918	0.085181		0.089449	0.117406	0.057519	0.081814		0.080191	0.078565	0.11643
D2	PDS	GrandMeanDD	0.701869	user->GrandMeanDD	486.751	0.079107	0.058031	0.053209	0.053846	0.063649	5.365629	4.029926	2.96511	3.707328	16.06799	0.413224	0.231521	0.155277	0.199979		0.128877	0.078108	0.117438	0.122207		0.056389	0.064639	0.085077	0.048518		0.040928	0.11606	0.063294	0.043515			0.126392	0.091115	0.117781	0.112909		0.060736	0.076164	0.075571	0.05625		0.051417	0.102841	0.074538
D21	PDS	GrandMeanDD	0.814908	user->GrandMeanDD	530.181	0.068623	0.066842	0.084046	0.070579	0.075664	3.249203	2.859059	3.768647	3.900287	13.7772	0.224465	0.192605	0.311431	0.271498		0.052835	0.079151	0.093663	0.052908		0.073821	0.069315	0.077832	0.079762		0.108503	0.09495	0.065603	0.109062			0.062694	0.083488	0.088712	0.060745		0.0732	0.073938	0.087599	0.079032		0.108582	0.092745	0.080515
D23	PDS	GrandMeanDD	0.77771	user->GrandMeanDD	560.659	0.069101	0.067875	0.065764	0.07747	0.070725	3.792269	3.690743	2.964453	3.950329	14.39779	0.258079	0.247189	0.193774	0.300958		0.089371	0.065861	0.097581	0.094244		0.057885	0.093448	0.058721	0.065887		0.072978	0.099782	0.091075	0.074133			0.092787	0.071486	0.098671	0.091613		0.069374	0.094702	0.066979	0.065983		0.072426	0.100099	0.097391
D24	PDS	GrandMeanDD	0.684672	user->GrandMeanDD	534.447	0.067343	0.073796	0.078184	0.065731	0.07248	3.413673	3.999974	3.431881	3.361234	14.20676	0.228892	0.288883	0.262908	0.219317		0.084459	0.073322	0.072179	0.083796		0.098627	0.089471	0.070637	0.095629		0.064188	0.07521	0.08956	0.062346			0.089405	0.07481	0.075184	0.092838		0.097102	0.092788	0.075472	0.093995		0.07271	0.074793	0.088616
D3	PDS	GrandMeanDD	0.781078	user->GrandMeanDD	414.551	0.074321	0.074035	0.071715	0.081043	0.076397	3.506953	3.426095	2.635628	3.924064	13.49274	0.256482	0.247601	0.184839	0.311078		0.082428	0.061626	0.104098	0.080718		0.057245	0.102365	0.058444	0.05479		0.073882	0.109415	0.103722	0.068728			0.088586	0.068367	0.103186	0.08759		0.06554	0.099491	0.063471	0.061606		0.070132	0.107627	0.105218
D4	PDS	GrandMeanDD	0.743605	user->GrandMeanDD	391.418	0.082216	0.066298	0.055929	0.081635	0.075003	4.687988	3.621117	1.6603	3.833449	13.80285	0.37301	0.234089	0.092693	0.300208		0.133734	0.048631	0.140939	0.132101		0.028639	0.091093	0.048318	0.030639		0.035875	0.146802	0.0853	0.036503			0.136189	0.058908	0.144596	0.122836		0.040833	0.097948	0.045635	0.034594		0.03828	0.133839	0.100295
D5	PDS	GrandMeanDD	0.736158	user->GrandMeanDD	507.395	0.056609	0.054961	0.047895	0.045189	0.052154	5.717926	5.40039	4.230833	4.178663	19.52781	0.318472	0.292441	0.200067	0.189019		0.120915	0.08431	0.07832	0.119684		0.073708	0.076683	0.082284	0.076146		0.051203	0.084235	0.073171	0.050955			0.115473	0.089718	0.08861	0.112644		0.083063	0.081519	0.080697	0.076519		0.058219	0.079956	0.075272
D6	PDS	GrandMeanDD	0.777648	user->GrandMeanDD	418.696	0.062045	0.059325	0.058258	0.068037	0.062477	4.335004	4.170927	3.211404	4.508651	16.22599	0.26572	0.245709	0.185678	0.302893		0.091319	0.060326	0.104926	0.09085		0.058945	0.09909	0.060076	0.064307		0.066887	0.105648	0.092422	0.070675			0.092616	0.071865	0.101786	0.091687		0.068661	0.096858	0.065727	0.06348		0.068882	0.103089	0.099167
D7	PDS	GrandMeanDD	0.753943	user->GrandMeanDD	435.371	0.064468	0.062363	0.060385	0.062891	0.063614	4.299487	4.008156	3.416818	4.379409	16.10387	0.272922	0.247468	0.208292	0.271318		0.085214	0.071111	0.102006	0.090126		0.061959	0.087735	0.072383	0.061835		0.071759	0.093163	0.094337	0.073355			0.090862	0.077139	0.098722	0.088719		0.069961	0.090441	0.072724	0.06739		0.073805	0.098817	0.092962
D8	PDS	GrandMeanDD	0.763288	user->GrandMeanDD	515.502	0.071586	0.064974	0.062369	0.078719	0.070369	4.033866	3.70597	2.83852	3.924015	14.50237	0.28328	0.238487	0.176472	0.301761		0.096677	0.066974	0.101665	0.0981		0.05904	0.088732	0.062167	0.058826		0.068662	0.105603	0.091221	0.063372			0.098562	0.074757	0.104676	0.095394		0.06666	0.093367	0.067461	0.061918		0.066328	0.103429	0.094858
D9	PDS	GrandMeanDD	0.788703	user->GrandMeanDD	507.25	0.074365	0.105717	0.077268	0.065252	0.085209	3.405212	3.568207	3.349965	2.515604	12.83899	0.246121	0.340904	0.251545	0.161431		0.104596	0.089601	0.056922	0.109343		0.101806	0.061549	0.083251	0.101224		0.062977	0.057772	0.067447	0.054635			0.105376	0.092174	0.066212	0.108843		0.105282	0.073566	0.092176	0.101321		0.066524	0.061318	0.065826
[truncated: 18 more columns]
